# Supplementary material for: Role of urinary H2O2, 8-iso-PGF2α, and serum oxLDL/β2GP1 complex in the diabetic kidney disease
Source: PubMed Central journal article supplement (PMC8982868; doi:10.1371/journal.pone.0263113), 2022-04-05
Supplement: pone.0263113.s001.pdf [file pone.0263113.s001.pdf]

| eGFR    | UACR<br>(mcg/mg) | isoprostan | 11dTXB2<br>(pg/mgkreatinin) | oxLDL complexes | hydrogen peroxyde |
|---------|------------------|------------|-----------------------------|-----------------|-------------------|
| 104.726 | 3.7              | 3548.567   | 1175.179                    | 0.121           | 50.532            |
| 103.106 | 0.0              | 5596.152   | 47.017                      | 0.229           | 41.263            |
| 99.553  | 10.5             | 7036.070   | 245.696                     | 0.095           | 45.636            |
| 78.805  | 12.4             | 5155.981   | 1493.479                    | 0.322           | 11.082            |
| 89.000  | 17.1             | 3588.776   | 969.641                     | 0.343           | 12.218            |
| 100.780 | 0.0              | 4356.223   | 1174.531                    | 0.840           | 7.444             |
| 110.747 | 0.0              | 7748.765   | 98.967                      | 0.371           | 29.193            |
| 83.068  | 11.9             | 1854.110   | 1595.958                    | 2.282           | 7.923             |
| 65.549  | 3.6              | 2636.901   | 1461.851                    | 0.208           | 9.997             |
| 113.162 | 0.0              | 6199.357   | 90.192                      | 0.216           | 23.653            |
| 28.457  | 556.2            | 6423.148   | 79.665                      | 0.534           | 3.584             |
| 130.202 | 0.0              | 11309.682  | 425.152                     | 0.165           | 18.800            |
| 94.313  | 7.3              | 2717.068   | 1583.422                    | 0.430           | 5.743             |
| 101.177 | 29.1             | 4725.598   | 316.720                     | 0.360           | 10.371            |
| 78.411  | 0.0              | 7139.849   | 17.043                      | 0.150           | 17.697            |
| 94.713  | 10.3             | 2527.335   | 701.287                     | 0.307           | 5.506             |
| 90.079  | 2.3              | 4397.328   | 100.865                     | 0.614           | 25.590            |
| 102.821 | 0.0              | 3395.240   | 175.831                     | 0.136           | 14.350            |
| 75.229  | 26.3             | 2826.977   | 944.173                     | 0.375           | 3.782             |
| 74.205  | 3.8              | 3223.316   | 685.888                     | 0.348           | 23.172            |
| 68.064  | 115.2            | 39541.554  | 1319.392                    | 0.293           | 61.512            |
| 109.363 | 21.6             | 9192.978   | 226.050                     | 0.635           | 18.986            |
| 83.009  | 39.6             | 4171.667   | 172.376                     | 1.324           | 9.720             |
| 101.177 | 10.3             | 8389.947   | 216.988                     | 0.872           | 35.168            |
| 96.052  | 7.8              | 4948.656   | 457.571                     | 1.032           | 41.108            |
| 77.706  | 60.7             | 4108.680   | 634.551                     | 1.224           | 8.741             |
| 75.255  | 14.8             | 4741.946   | 1758.813                    | 0.293           | 5.082             |
| 22.037  | 466.4            | 2711.208   | 389.881                     | 1.534           | 11.690            |
| 59.263  |                  | 5447.733   | 71.608                      | 1.174           | 19.665            |
| 92.505  |                  | 9636.697   | 357.304                     | 0.558           | 36.346            |
| 114.806 |                  | 2649.576   | 1572.806                    | 0.522           | 42.775            |
| 104.399 |                  | 3154.757   | 407.436                     | 1.037           | 14.941            |
| 68.314  |                  | 2250.081   | 953.435                     | 0.260           | 19.238            |
| 111.635 |                  | 7956.459   | 474.102                     | 0.512           | 13.163            |
| 29.932  |                  | 1932.669   | 399.684                     | 0.921           | 9.677             |
| 50.588  |                  | 8432.538   | 221.374                     | 0.708           | 10.744            |
| 51.128  |                  | 39050.971  | 163.404                     | 0.278           | 16.706            |
| 98.630  |                  | 1006.100   | 448.031                     | 0.333           | 7.391             |
| 8.127   |                  | 2385.307   | 39.613                      | 1.891           | 5.954             |
| 106.313 |                  | 2664.683   | 176.734                     | 0.250           | 6.570             |
| 73.667  |                  | 6681.242   | 684.649                     | 0.335           | 3.295             |
| 104.740 |                  | 1251.624   | 735.959                     | 0.248           | 4.497             |
| 104.723 |                  | 3522.444   | 624.386                     | 0.221           | 7.533             |
| 65.741  |                  | 2686.483   | 470.973                     | 0.346           | 7.230             |
| 63.321  |                  | 2170.868   | 467.929                     | 0.499           | 1.427             |

|         |       |           |           |       |         |
|---------|-------|-----------|-----------|-------|---------|
| 98.237  |       | 3031.455  | 762.125   | 0.500 | 5.240   |
| 98.160  |       | 5036.624  | 891.539   | 0.185 | 6.645   |
| 105.877 |       | 52081.611 | 46.112    | 0.500 | 42.616  |
| 115.227 |       | 3568.163  | 269.459   | 0.200 | 104.022 |
| 45.241  |       | 3006.304  | 87.082    | 0.315 | 10.315  |
| 63.576  |       | 6820.084  | 17.877    | 0.549 | 22.959  |
| 68.853  |       | 5285.171  | 37.213    | 0.307 | 21.064  |
| 119.988 |       | 4351.530  | 259.118   | 0.368 | 22.383  |
| 95.038  |       | 6227.221  | 222.260   | 0.637 | 18.227  |
| 98.974  |       | 4940.697  | 66.302    | 0.192 | 53.827  |
| 106.986 |       | 6115.919  | 465.985   | 0.771 | 15.812  |
| 98.630  |       | 5675.345  | 126.483   | 0.185 | 49.302  |
| 76.586  |       | 3532.656  | 246.100   | 0.215 | 42.211  |
| 50.756  |       | 3806.590  | 1002.443  | 0.156 | 12.381  |
| 31.913  |       | 7913.564  | 141.368   | 0.329 | 39.997  |
| 73.018  | 0.0   | 1800.091  | 1729.278  | 0.460 | 7.377   |
| 115.615 | 2.7   | 5524.254  | 5273.787  | 0.505 | 36.940  |
| 81.051  | 0.0   | 6480.315  | 9529.703  | 1.553 | 17.770  |
| 67.738  | 0.0   | 1038.404  | 3888.063  | 1.016 | 16.475  |
| 53.875  | 50.6  | 4517.928  | 4615.477  | 0.751 | 47.222  |
| 76.399  | 0.0   | 3649.763  | 5436.048  | 0.649 | 174.132 |
| 95.176  | 40.7  | 4296.164  | 3028.653  | 0.448 | 49.474  |
| 92.505  | 93.8  | 6251.390  | 5803.178  | 0.626 | 49.240  |
| 102.789 | 72.0  | 1544.012  | 2369.786  | 1.052 | 132.393 |
| 88.921  | 17.0  | 2106.134  | 342.053   | 0.420 | 28.592  |
| 34.946  | 0.0   | 5873.318  | 614.895   | 0.513 | 36.000  |
| 36.257  | 0.0   | 6583.316  | 2627.388  | 0.740 | 56.962  |
| 90.218  | 67.0  | 3391.674  | 3477.093  | 0.355 | 62.777  |
| 82.004  | 126.8 | 8015.915  | 5320.706  | 1.023 | 422.727 |
| 108.597 | 528.3 | 4600.798  | 9017.982  | 0.759 | 106.341 |
| 102.070 | 78.1  | 1873.406  | 4575.913  | 0.511 | 34.483  |
| 69.635  | 0.0   | 2528.943  | 2498.978  | 0.465 | 155.000 |
| 104.973 | 1.1   | 1312.637  | 4448.469  | 0.705 | 60.000  |
| 75.281  | 2.3   | 1909.713  | 7338.177  | 0.507 | 96.825  |
| 67.401  | 0.0   | 3543.503  | 4815.116  | 1.997 | 26.582  |
| 111.635 | 6.9   | 666.344   | 4879.692  | 0.336 | 20.471  |
| 93.900  | 0.0   | 60.476    | 5053.347  | 0.963 | 26.471  |
| 106.229 | 0.0   | 2605.040  | 1658.347  | 0.571 | 78.355  |
| 77.925  | 17.8  | 1996.590  | 1953.487  | 1.126 | 21.512  |
| 88.824  | 0.0   | 1625.201  | 2655.032  | 0.478 | 41.466  |
| 119.059 | 2.9   | 3346.440  | 5969.294  | 0.582 | 145.122 |
| 25.322  | 15.3  | 3773.329  | 895.237   | 1.376 | 50.829  |
| 123.506 | 82.2  | 2703.134  | 4542.672  | 0.604 | 29.240  |
| 27.018  | 0.0   | 1442.873  | 1985.212  | 0.408 | 62.130  |
| 100.253 | 7.4   | 2462.643  | 4916.193  | 0.787 | 32.574  |
| 95.439  | 27.9  | 2274.521  | 12267.904 | 0.585 | 22.411  |
| 86.232  | 33.9  | 1771.684  | 2353.112  | 0.600 | 13.176  |
| 100.850 | 2.3   | 3026.444  | 16145.925 | 0.571 | 21.698  |

|         |        |            |            |       |          |
|---------|--------|------------|------------|-------|----------|
| 102.556 | 13.4   | 2352.112   | 9090.477   | 0.921 | 16.338   |
| 53.998  | 0.0    | 1148.824   | 23925.761  | 0.551 | 10.590   |
| 88.910  | 10.7   | 1060.670   | 5457.098   | 0.432 | 1.212    |
| 110.980 | 0.0    | 21496.723  | 2588.457   | 0.349 | 12.548   |
| 41.022  | 134.2  | 33953.904  | 3123.561   | 0.425 | 18.791   |
| 74.728  | 0.0    | 716217.571 | 27263.351  | 0.408 | 173.875  |
| 110.853 | 50.1   | 48079.298  | 11591.101  | 0.341 | 48.922   |
| 118.408 | 79.7   | 5439.323   | 196.452    | 0.849 | 578.806  |
| 43.689  | 0.0    | 14079.401  | 4804.753   | 0.475 | 73.285   |
| 118.835 | 0.0    | 42733.202  | 11019.741  | 0.477 | 79.147   |
| 102.512 | 19.3   | 22191.355  | 4685.029   | 0.559 | 27.833   |
| 81.051  | 14.8   | 17968.290  | 4623.650   | 0.719 | 31.884   |
| 35.565  | 0.0    | 34063.850  | 6921.649   | 0.434 | 50.933   |
| 100.832 | 8.5    | 27049.513  | 6576.005   | 0.743 | 25.698   |
| 115.677 | 15.2   | 40383.197  | 10565.004  | 0.540 | 23.562   |
| 48.724  | 3.7    | 15930.784  | 4623.312   | 0.576 | 35.253   |
| 73.195  | 91.7   | 4179.051   | 25347.032  | 1.228 | 17.075   |
| 72.394  | 0.0    | 15952.556  | 43134.071  | 0.859 | 60.426   |
| 97.203  | 29.3   | 1749.094   | 29631.953  | 0.634 | 24.145   |
| 93.157  | 0.0    | 2995.926   | 57197.774  | 1.327 | 62.432   |
| 104.351 | 0.0    | 3833.618   | 294729.036 | 1.163 | 96.026   |
| 101.350 | 0.0    | 849.174    | 42550.322  | 0.365 | 26.034   |
| 116.396 | 219.7  | 1742.806   | 6856.624   | 1.876 | 59.155   |
| 92.089  | 0.0    | 4541.310   | 154182.004 | 0.352 | 51.206   |
| 85.251  | 0.0    | 1906.830   | 201581.374 | 0.449 | 29.928   |
| 35.631  | 13.5   | 1913.354   | 388.877    | 0.404 | 28.593   |
| 91.173  | 1358.1 | 6599.302   | 139817.930 | 2.274 | 2830.769 |
| 44.097  | 0.0    | 1473.305   | 39094.130  | 0.244 | 48.638   |
| 109.719 | 30.3   | 1231.423   | 1393.560   | 0.316 | 75.610   |
| 101.177 | 0.0    | 2273.745   | 2511.158   | 0.308 | 105.420  |
| 46.014  | 22.6   | 1709.612   | 479.051    | 0.898 | 33.898   |
| 94.847  | 48.7   | 34891.719  | 0.000      | 0.330 | 68.649   |
| 94.050  | 0.0    | 3237.266   | 4181.888   | 0.479 | 63.872   |
| 114.706 | 0.0    | 4094.025   | 6986.995   | 0.303 | 72.519   |
| 117.398 | 0.0    | 7038.605   | 46425.054  | 0.545 | 530.556  |
| 38.438  | 0.0    | 1236.649   | 732.124    | 0.408 | 12.476   |
| 93.814  | 1549.2 | 9987.068   | 10876.532  | 0.395 | 205.283  |
| 95.768  | 0.0    | 3518.803   | 42297.180  | 0.480 | 337.956  |
| 82.437  | 1481.6 | 7420.394   | 25583.906  | 0.372 | 704.444  |
| 96.337  | 306.1  | 3481.055   | 1681.008   | 0.430 | 177.922  |
| 45.895  | 0.0    | 10638.945  | 3938.392   | 0.426 | 44.891   |
| 111.692 | 27.7   | 3771.742   | 8443.271   | 0.501 | 102.194  |
| 94.509  | 0.0    | 3466.971   | 13100.977  | 0.450 | 87.811   |
| 110.774 | 0.0    | 4328.187   | 40502.660  | 0.347 | 369.828  |
| 110.774 | 0.0    | 2730.570   | 490.114    | 0.293 | 99.784   |
| 66.843  | 0.0    | 2600.820   | 9557.718   | 0.432 | 138.732  |
| 97.412  | 0.0    | 4862.973   | 49027.777  | 0.308 | 1510.714 |
| 55.085  | 0.0    | 5634.321   | 377.908    | 1.600 | 97.354   |

|         |        |             |            |       |         |
|---------|--------|-------------|------------|-------|---------|
| 95.071  | 0.0    | 3767.724    | 4036.822   | 0.550 | 9.226   |
| 82.799  | 45.2   | 6369.670    | 10405.274  | 0.360 | 63.026  |
| 37.072  | 51.4   | 598.319     | 9709.404   | 0.350 | 68.059  |
| 93.157  | 1539.9 | 3966.840    | 642.258    | 0.360 | 50.799  |
| 101.179 | 0.0    | 3483.749    | 5407.097   | 0.330 | 41.918  |
| 90.932  | 0.0    | 32540.195   | 15943.917  | 0.500 | 40.000  |
| 119.059 | 0.0    | 14923.682   | 2655.914   | 0.280 | 37.229  |
| 114.998 | 31.9   | 41203.001   | 615.192    | 0.660 | 18.632  |
| 39.025  | 0.0    | 52326.682   | 1972.269   | 0.310 | 15.926  |
| 104.792 | 425.9  | 31949.193   | 14687.613  | 0.670 | 0.968   |
| 88.782  | 471.5  | 2273791.593 | 57926.498  | 0.230 | 25.455  |
| 123.106 | 0.0    | 12876.268   | 92.889     | 0.620 | 14.091  |
| 95.593  | 16.4   | 91717.972   | 11466.335  | 0.400 | 2.308   |
| 106.269 | 1266.7 | 121254.250  | 38203.332  | 0.390 | 423.387 |
| 101.927 | 0.0    | 34750.525   | 19768.062  | 0.300 | 85.556  |
| 98.409  | 0.0    | 190942.779  | 142255.075 | 0.480 | 23.016  |
| 94.775  | 0.0    | 41667.580   | 6592.963   | 0.410 | 5.556   |
| 63.947  | 0.0    | 18963.560   | 8774.374   | 0.400 | 33.603  |
| 107.150 | 612.5  | 121121.846  | 19743.982  | 0.180 | 97.354  |
| 67.170  | 0.0    | 51350.051   | 24080.962  | 0.320 | 103.846 |
| 52.607  | 1516.9 | 31909.233   | 11574.728  | 0.340 | 48.795  |
| 93.667  | 277.4  | 46952.446   | 8868.693   | 0.310 | 38.038  |
| 64.050  | 114.5  | 15911.126   | 6215.231   | 1.000 | 38.910  |
| 41.113  | 1.8    | 87207.366   | 7240.354   | 0.420 | 31.928  |
| 105.087 | 0.0    | 49404.388   | 8213.541   | 0.200 | 70.741  |
| 49.786  | 0.8    | 20109.757   | 2305.937   | 0.340 | 30.982  |
| 125.253 | 0.0    | 1183.436    | 2504.044   | 0.390 | 13.540  |
| 79.522  | 22.0   | 9217.307    | 7896.852   | 0.320 | 9.605   |
| 12.848  | 37.0   | 4286.775    | 7930.699   | 0.440 | 6.257   |
| 111.765 | 0.0    | 8508.848    |            | 0.300 | 18.321  |
| 85.384  | 422.2  | 25135.582   | 49607.673  | 0.410 | 162.963 |
| 77.535  | 102.5  | 16091.604   | 60398.803  | 0.350 | 176.744 |
| 103.000 | 104.4  | 5631.550    |            | 0.970 | 19.618  |
| 90.000  | 11.8   | 1981.280    |            | 0.110 | 11.396  |
| 106.000 | 17.0   | 6695.770    |            | 0.150 | 30.724  |
| 105.000 | 36.1   | 13139.750   |            | 0.150 | 18.249  |
| 103.000 | 28.3   | 1357.840    |            | 0.150 | 23.676  |
| 111.000 | 10.8   | 13006.800   |            | 0.180 | 18.442  |
| 108.000 | 98.2   | 4428.960    |            | 0.240 | 9.606   |
| 92.000  | 481.6  | 6550.200    |            | 0.180 | 27.173  |
| 91.000  | 27.4   | 2514.570    |            | 0.140 | 3.432   |
| 112.000 | 10.2   | 3451.190    |            | 0.230 | 12.933  |
| 96.000  | 6.6    | 3000.470    |            | 0.150 | 24.115  |
| 111.000 | 45.6   | 3129.260    |            | 0.070 | 34.737  |
| 92.000  | 6.0    | 4287.780    |            | 0.330 | 12.980  |
| 115.000 | 12.3   | 7501.950    |            | 0.370 | 16.778  |
| 94.000  | 10.8   | 3372.500    |            | 0.270 | 2.627   |
| 103.000 | 481.6  | 16274.190   |            | 0.260 | 20.921  |

|         |       |           |  |       |        |
|---------|-------|-----------|--|-------|--------|
| 98.000  | 9.8   | 9244.650  |  | 0.440 | 10.314 |
| 91.000  | 9.1   | 7761.600  |  | 0.770 | 9.282  |
| 98.000  | 13.9  | 2659.360  |  | 0.110 | 11.483 |
| 95.000  | 16.2  | 8762.420  |  | 1.000 | 16.522 |
| 93.000  | 15.4  | 10636.240 |  | 0.800 | 2.535  |
| 100.000 | 0.0   | 33828.890 |  | 0.180 | 7.078  |
| 101.000 | 9.9   | 5063.610  |  | 0.670 | 12.232 |
| 95.000  | 257.8 | 2351.970  |  | 0.270 | 22.395 |
| 112.000 | 115.6 | 6604.510  |  | 0.190 | 6.658  |
| 97.000  | 43.2  | 3119.420  |  | 0.130 | 8.966  |
| 87.000  | 630.9 | 5003.940  |  | 1.990 | 14.148 |
| 81.000  | 26.2  | 7669.390  |  | 0.210 | 7.850  |
| 69.000  | 465.1 | 2798.490  |  | 0.380 | 10.262 |
| 89.000  | 51.2  | 9293.440  |  | 0.940 | 4.254  |
| 85.000  | 19.6  | 5289.440  |  | 0.320 | 10.124 |
| 78.000  | 125.4 | 1978.040  |  | 0.200 | 2.919  |
| 82.000  | 106.6 | 2041.960  |  | 0.390 | 4.988  |
| 73.000  | 23.3  | 20185.360 |  | 0.790 | 25.354 |
| 82.000  | 37.0  | 779.900   |  | 0.070 | 3.000  |
| 66.000  | 115.1 | 8216.350  |  | 0.230 | 6.742  |
| 67.000  | 8.8   | 6546.620  |  | 0.150 | 10.388 |
| 66.000  | 8.0   | 4505.400  |  | 0.120 | 7.127  |
| 85.000  | 12.6  | 10184.490 |  | 0.770 | 7.383  |
| 77.000  | 15.8  | 3050.170  |  | 0.150 | 14.893 |
| 66.000  | 25.4  | 2163.150  |  | 0.180 | 10.525 |
| 89.000  | 299.9 | 6373.880  |  | 0.820 | 12.995 |
| 71.000  | 112.5 | 9172.580  |  | 0.140 | 9.884  |
| 83.000  | 7.2   | 9122.150  |  | 0.190 | 6.575  |
| 66.000  | 9.0   | 5447.750  |  | 0.500 | 8.326  |
| 87.000  | 9.7   | 9664.960  |  | 0.200 | 10.232 |
| 88.000  | 88.9  | 7620.580  |  | 0.450 | 12.930 |
| 89.000  | 97.4  | 10692.580 |  | 0.130 | 5.305  |
| 69.000  | 101.0 | 6261.510  |  | 0.140 | 7.229  |
| 61.000  | 238.9 | 3889.290  |  | 0.260 | 6.504  |
| 77.000  | 4.9   | 2602.860  |  | 0.630 | 5.111  |
| 65.000  | 16.4  | 4265.120  |  | 0.170 | 52.875 |
| 88.000  | 0.0   | 8649.750  |  | 0.110 | 10.114 |
| 69.000  | 4.5   | 1875.770  |  | 1.010 | 14.491 |

| Data          | Jenis Kelamin<br>(1=laki,2=pere<br>mpuan) | Usia<br>(tahun) | BB (kg) | TB (cm) | TB (m) | BMI    | BSA   |
|---------------|-------------------------------------------|-----------------|---------|---------|--------|--------|-------|
| 2015 sitanala | 2                                         | 65              | 50.0    | 160.0   | 1.600  | 19.531 | 1.501 |
|               | 2                                         | 54              | 59.0    | 152.0   | 1.520  | 25.537 | 1.552 |
|               | 1                                         | 64              | 39.0    | 154.0   | 1.540  | 16.445 | 1.314 |
|               | 2                                         | 65              | 76.0    |         |        |        |       |
|               | 2                                         | 65              |         | 155.0   | 1.550  |        |       |
|               | 2                                         | 55              | 58.5    | 151.0   | 1.510  | 25.657 | 1.539 |
|               | 2                                         | 47              | 57.0    | 158.0   | 1.580  | 22.833 | 1.573 |
|               | 2                                         | 49              | 47.0    | 160.0   | 1.600  | 18.359 | 1.462 |
|               | 2                                         | 65              | 58.0    | 158.0   | 1.580  | 23.233 | 1.584 |
|               | 2                                         | 55              | 61.0    | 156.0   | 1.560  | 25.066 | 1.604 |
|               | 2                                         | 51              | 44.0    | 148.0   | 1.480  | 20.088 | 1.344 |
|               | 2                                         | 51              | 68.0    | 147.5   | 1.475  | 31.255 | 1.613 |
|               | 2                                         | 63              | 72.0    | 152.0   | 1.520  | 31.163 | 1.689 |
|               | 2                                         | 53              | 82.0    | 153.0   | 1.530  | 35.029 | 1.793 |
|               | 1                                         | 60              | 68.0    | 169.0   | 1.690  | 23.809 | 1.780 |
|               | 2                                         | 61              | 71.0    |         |        |        |       |
|               | 1                                         | 63              | 79.0    | 170.0   | 1.700  | 27.336 | 1.905 |
|               | 2                                         | 50              | 52.0    |         |        |        |       |
|               | 2                                         | 57              | 51.0    | 148.0   | 1.480  | 23.283 | 1.431 |
|               | 2                                         | 63              | 67.0    | 146.0   | 1.460  | 31.432 | 1.591 |
|               | 1                                         | 63              | 68.0    | 164.0   | 1.640  | 25.283 | 1.742 |
|               | 2                                         | 54              | 73.0    | 158.0   | 1.580  | 29.242 | 1.747 |
|               | 2                                         | 41              | 59.0    | 156.0   | 1.560  | 24.244 | 1.581 |
|               | 2                                         | 53              | 94.0    | 150.0   | 1.500  | 41.778 | 1.873 |
|               | 1                                         | 52              | 77.0    | 161.0   | 1.610  | 29.706 | 1.812 |
|               | 2                                         | 67              | 68.0    | 146.0   | 1.460  | 31.901 | 1.601 |
|               | 2                                         | 61              | 57.0    | 148.0   | 1.480  | 26.023 | 1.500 |
|               | 1                                         | 60              | 65.0    | 164.0   | 1.640  | 24.167 | 1.709 |
|               | 2                                         | 65              | 62.0    | 141.0   | 1.410  | 31.186 | 1.501 |
|               | 2                                         | 63              | 62.0    | 147.5   | 1.475  | 28.498 | 1.551 |
|               | 2                                         | 54              | 44.5    | 147.5   | 1.475  | 20.454 | 1.347 |
|               | 2                                         | 53              | 64.0    | 155.0   | 1.550  | 26.639 | 1.629 |
|               | 1                                         | 51              | 56.0    | 170.0   | 1.700  | 19.377 | 1.646 |
|               | 2                                         | 52              | 85.0    | 160.0   | 1.600  | 33.203 | 1.881 |
|               | 2                                         | 63              | 47.0    | 149.0   | 1.490  | 21.170 | 1.389 |
|               | 1                                         | 61              | 71.0    | 160.0   | 1.600  | 27.734 | 1.742 |
|               | 2                                         | 59              | 58.0    | 148.0   | 1.480  | 26.479 | 1.511 |
|               | 1                                         | 63              | 64.0    | 169.0   | 1.690  | 22.408 | 1.735 |
|               | 2                                         | 56              | 76.0    | 148.0   | 1.480  | 34.697 | 1.695 |
|               | 1                                         | 65              | 64.0    | 162.0   | 1.620  | 24.387 | 1.682 |
|               | 2                                         | 62              | 78.0    | 148.5   | 1.485  | 35.371 | 1.718 |
|               | 2                                         | 51              | 49.0    | 144.0   | 1.440  | 23.630 | 1.379 |
|               | 1                                         | 48              | 47.0    | 167.0   | 1.670  | 16.853 | 1.508 |
|               | 1                                         | 65              | 43.0    | 151.5   | 1.515  | 18.735 | 1.353 |
|               | 1                                         | 55              | 75.0    | 165.0   | 1.650  | 27.548 | 1.824 |

|                                        |   |    |      |       |       |        |       |
|----------------------------------------|---|----|------|-------|-------|--------|-------|
|                                        | 2 | 52 | 53.0 | 149.5 | 1.495 | 23.713 | 1.465 |
|                                        | 1 | 60 | 70.0 | 166.0 | 1.660 | 25.403 | 1.779 |
|                                        | 2 | 51 | 60.5 | 152.5 | 1.525 | 26.015 | 1.572 |
|                                        | 1 | 49 | 63.0 | 160.0 | 1.600 | 24.609 | 1.656 |
|                                        | 2 | 48 | 46.5 | 144.0 | 1.440 | 22.425 | 1.348 |
|                                        | 2 | 55 | 61.0 | 160.0 | 1.600 | 23.828 | 1.633 |
|                                        | 2 | 58 | 64.0 |       |       |        |       |
|                                        | 1 | 62 | 61.0 | 164.0 | 1.640 | 22.680 | 1.663 |
|                                        | 2 | 45 | 53.0 |       |       |        |       |
|                                        | 2 | 63 | 59.0 |       |       |        |       |
|                                        | 1 | 57 | 77.0 | 165.0 | 1.650 | 28.283 | 1.844 |
|                                        | 1 | 63 | 59.5 | 160.0 | 1.600 | 23.242 | 1.616 |
|                                        | 1 | 65 | 71.0 | 174.0 | 1.740 | 23.451 | 1.852 |
|                                        | 1 | 56 | 57.0 | 162.0 | 1.620 | 21.719 | 1.601 |
|                                        | 2 | 51 | 53.0 | 148.0 | 1.480 | 24.196 | 1.454 |
| <b>Data 2016</b>                       | 1 | 50 | 74.0 | 164.0 | 1.640 | 27.513 | 1.805 |
| 2016 albumin<br>urinnya dalam<br>mg/dl | 2 | 53 | 54.0 | 148.0 | 1.480 | 24.653 | 1.466 |
|                                        | 2 | 61 | 62.0 | 147.0 | 1.470 | 28.692 | 1.547 |
|                                        | 2 | 53 | 69.0 | 155.0 | 1.550 | 28.720 | 1.682 |
|                                        | 1 | 75 | 59.0 | 163.0 | 1.630 | 22.206 | 1.632 |
|                                        | 2 | 63 | 49.0 | 150.0 | 1.500 | 21.778 | 1.420 |
|                                        | 2 | 61 | 86.0 | 156.0 | 1.560 | 35.339 | 1.856 |
|                                        | 2 | 63 | 57.5 | 146.0 | 1.460 | 26.975 | 1.491 |
|                                        | 2 | 56 | 61.0 | 145.0 | 1.450 | 29.013 | 1.521 |
|                                        | 2 | 50 | 67.5 | 149.0 | 1.490 | 30.404 | 1.619 |
|                                        | 2 | 67 | 47.0 | 151.0 | 1.510 | 20.613 | 1.402 |
|                                        | 2 | 71 | 50.0 | 148.0 | 1.480 | 22.827 | 1.419 |
|                                        | 2 | 57 | 64.0 | 154.0 | 1.540 | 26.986 | 1.622 |
|                                        | 2 | 66 | 43.0 | 140.0 | 1.400 | 21.939 | 1.278 |
|                                        | 2 | 55 | 58.0 | 148.0 | 1.480 | 26.479 | 1.511 |
|                                        | 2 | 57 | 63.0 | 160.0 | 1.600 | 24.609 | 1.656 |
|                                        | 2 | 68 | 52.0 | 146.0 | 1.460 | 24.395 | 1.428 |
|                                        | 2 | 45 | 67.0 | 148.0 | 1.480 | 30.588 | 1.607 |
|                                        | 2 | 51 | 62.0 | 156.0 | 1.560 | 25.477 | 1.615 |
|                                        | 1 | 57 | 61.0 | 154.0 | 1.540 | 25.721 | 1.589 |
|                                        | 2 | 52 | 60.0 | 156.0 | 1.560 | 24.655 | 1.593 |
|                                        | 1 | 67 | 75.0 | 160.0 | 1.600 | 29.297 | 1.783 |
|                                        | 2 | 64 | 50.5 | 148.0 | 1.480 | 23.055 | 1.425 |
|                                        | 2 | 54 | 46.5 | 146.0 | 1.460 | 21.815 | 1.362 |
|                                        | 1 | 62 | 70.0 | 155.0 | 1.550 | 29.136 | 1.692 |
|                                        | 2 | 51 | 74.0 | 144.0 | 1.440 | 35.687 | 1.643 |
|                                        | 2 | 60 | 62.0 | 160.0 | 1.600 | 24.219 | 1.645 |
|                                        | 2 | 53 | 75.5 | 147.0 | 1.470 | 34.939 | 1.682 |
|                                        | 2 | 61 | 55.0 | 155.0 | 1.550 | 22.893 | 1.528 |
|                                        | 2 | 62 | 48.0 | 142.0 | 1.420 | 23.805 | 1.353 |
|                                        | 2 | 65 | 45.0 | 144.0 | 1.440 | 21.701 | 1.330 |
|                                        | 1 | 70 | 88.0 | 162.0 | 1.620 | 33.531 | 1.926 |
|                                        | 2 | 62 | 64.0 | 155.0 | 1.550 | 26.639 | 1.629 |

|  |   |    |      |       |       |        |       |
|--|---|----|------|-------|-------|--------|-------|
|  | 2 | 54 | 50.0 | 144.0 | 1.440 | 24.113 | 1.391 |
|  | 2 | 65 | 71.0 | 151.0 | 1.510 | 31.139 | 1.671 |
|  | 2 | 70 | 64.0 | 145.0 | 1.450 | 30.440 | 1.552 |
|  | 2 | 51 | 62.0 | 156.0 | 1.560 | 25.477 | 1.615 |
|  | 2 | 67 | 53.5 | 150.0 | 1.500 | 23.778 | 1.474 |
|  | 2 | 62 | 66.0 | 151.0 | 1.510 | 28.946 | 1.620 |
|  | 2 | 53 | 70.0 | 165.0 | 1.650 | 25.712 | 1.771 |
|  | 2 | 59 | 43.0 | 147.0 | 1.470 | 19.899 | 1.324 |
|  | 2 | 70 | 51.0 | 155.0 | 1.550 | 21.228 | 1.479 |
|  | 2 | 46 | 50.0 | 152.0 | 1.520 | 21.641 | 1.446 |
|  | 2 | 58 | 67.0 | 149.0 | 1.490 | 30.179 | 1.614 |
|  | 2 | 61 | 77.0 | 160.0 | 1.600 | 30.078 | 1.803 |
|  | 1 | 73 | 71.0 | 159.0 | 1.590 | 28.084 | 1.734 |
|  | 1 | 65 | 64.0 | 160.0 | 1.600 | 25.000 | 1.667 |
|  | 2 | 54 | 49.0 | 146.0 | 1.460 | 22.987 | 1.393 |
|  | 1 | 68 | 63.0 | 160.0 | 1.600 | 24.609 | 1.656 |
|  | 2 | 55 | 52.0 | 150.0 | 1.500 | 23.111 | 1.457 |
|  | 2 | 49 | 67.0 | 151.0 | 1.510 | 29.385 | 1.630 |
|  | 2 | 58 | 70.0 | 161.0 | 1.610 | 27.005 | 1.740 |
|  | 2 | 62 | 65.5 | 149.0 | 1.490 | 29.503 | 1.599 |
|  | 2 | 58 | 54.0 | 140.0 | 1.400 | 27.551 | 1.408 |
|  | 2 | 50 | 56.5 | 152.0 | 1.520 | 24.455 | 1.523 |
|  | 2 | 47 | 58.5 | 151.0 | 1.510 | 25.657 | 1.539 |
|  | 2 | 65 | 61.5 | 147.0 | 1.470 | 28.460 | 1.541 |
|  | 2 | 56 | 64.0 | 153.0 | 1.530 | 27.340 | 1.614 |
|  | 2 | 62 | 51.0 | 149.0 | 1.490 | 22.972 | 1.438 |
|  | 2 | 70 | 48.5 | 150.0 | 1.500 | 21.556 | 1.414 |
|  | 2 | 58 | 62.0 | 151.0 | 1.510 | 27.192 | 1.577 |
|  | 2 | 50 | 57.0 | 150.0 | 1.500 | 25.333 | 1.515 |
|  | 2 | 53 | 65.0 | 152.0 | 1.520 | 28.134 | 1.617 |
|  | 1 | 64 | 65.0 | 165.0 | 1.650 | 23.875 | 1.716 |
|  | 2 | 57 | 48.5 | 144.0 | 1.440 | 23.389 | 1.373 |
|  | 2 | 62 | 58.0 | 150.0 | 1.500 | 25.778 | 1.526 |
|  | 2 | 42 | 65.0 | 162.0 | 1.620 | 24.768 | 1.693 |
|  | 2 | 53 | 79.0 | 154.0 | 1.540 | 33.311 | 1.773 |
|  | 1 | 49 | 54.0 | 158.0 | 1.580 | 21.631 | 1.537 |
|  | 2 | 61 | 59.0 | 152.0 | 1.520 | 25.537 | 1.552 |
|  | 2 | 63 | 59.0 | 154.0 | 1.540 | 24.878 | 1.567 |
|  | 2 | 63 | 79.0 | 150.0 | 1.500 | 35.111 | 1.740 |
|  | 2 | 50 | 50.0 | 153.0 | 1.530 | 21.359 | 1.453 |
|  | 1 | 33 | 74.0 | 160.0 | 1.600 | 28.906 | 1.773 |
|  | 2 | 51 | 62.0 | 150.0 | 1.500 | 27.556 | 1.570 |
|  | 2 | 62 | 65.0 | 161.0 | 1.610 | 25.076 | 1.686 |
|  | 2 | 56 | 61.0 | 145.0 | 1.450 | 29.013 | 1.521 |
|  | 2 | 56 | 62.0 | 154.0 | 1.540 | 26.143 | 1.600 |
|  | 2 | 66 | 70.0 | 150.0 | 1.500 | 31.111 | 1.653 |
|  | 1 | 57 | 58.0 | 156.0 | 1.560 | 23.833 | 1.570 |
|  | 2 | 72 | 46.0 | 142.0 | 1.420 | 22.813 | 1.329 |



|                  |   |    |      |       |       |        |       |
|------------------|---|----|------|-------|-------|--------|-------|
|                  | 1 | 66 | 68.0 | 160.0 | 1.600 | 26.562 | 1.711 |
|                  | 1 | 72 | 70.0 | 165.0 | 1.650 | 25.712 | 1.771 |
|                  | 2 | 62 | 55.0 | 157.0 | 1.570 | 22.313 | 1.542 |
|                  | 2 | 62 | 66.0 | 153.0 | 1.530 | 28.194 | 1.635 |
|                  | 2 | 66 | 41.0 | 148.0 | 1.480 | 18.718 | 1.304 |
|                  | 2 | 63 | 47.0 | 149.0 | 1.490 | 21.170 | 1.389 |
|                  | 2 | 51 | 58.0 | 140.0 | 1.400 | 29.592 | 1.451 |
|                  | 1 | 60 | 63.0 | 157.0 | 1.570 | 25.559 | 1.633 |
|                  | 2 | 57 | 60.0 | 143.0 | 1.430 | 29.341 | 1.495 |
|                  | 2 | 58 | 36.0 | 140.0 | 1.400 | 18.367 | 1.185 |
|                  | 2 | 64 | 56.0 | 150.0 | 1.500 | 24.889 | 1.503 |
|                  | 2 | 62 | 58.0 | 156.0 | 1.560 | 23.833 | 1.570 |
|                  | 2 | 59 | 64.0 | 145.0 | 1.450 | 30.440 | 1.552 |
|                  | 2 | 65 | 61.0 | 155.0 | 1.550 | 25.390 | 1.596 |
|                  | 2 | 58 | 56.0 | 150.0 | 1.500 | 24.889 | 1.503 |
|                  | 2 | 63 | 50.0 | 141.0 | 1.410 | 25.150 | 1.370 |
|                  | 2 | 70 | 53.0 | 153.0 | 1.530 | 22.641 | 1.490 |
|                  | 2 | 63 | 64.0 | 145.0 | 1.450 | 30.440 | 1.552 |
|                  | 2 | 56 | 56.0 | 150.0 | 1.500 | 24.889 | 1.503 |
|                  | 2 | 56 | 44.0 | 143.0 | 1.430 | 21.517 | 1.311 |
|                  | 2 | 64 | 56.0 | 161.0 | 1.610 | 21.604 | 1.582 |
|                  | 2 | 54 | 52.0 | 150.0 | 1.500 | 23.111 | 1.457 |
|                  | 2 | 74 | 57.5 | 146.0 | 1.460 | 26.975 | 1.491 |
|                  | 1 | 67 | 56.0 | 142.0 | 1.420 | 27.772 | 1.445 |
|                  | 2 | 57 | 64.0 | 151.0 | 1.510 | 28.069 | 1.599 |
|                  | 2 | 57 | 59.0 | 151.0 | 1.510 | 25.876 | 1.544 |
|                  | 2 | 51 | 57.0 | 158.0 | 1.580 | 22.833 | 1.573 |
|                  | 1 | 55 | 66.0 | 159.0 | 1.590 | 26.107 | 1.681 |
|                  | 2 | 57 | 61.5 | 145.0 | 1.450 | 29.251 | 1.526 |
|                  | 2 | 60 | 59.0 | 154.0 | 1.540 | 24.878 | 1.567 |
|                  | 2 | 58 | 76.0 | 146.0 | 1.460 | 35.654 | 1.678 |
|                  | 1 | 67 | 46.0 | 168.0 | 1.680 | 16.298 | 1.501 |
| <b>Data 2019</b> | 2 | 54 | 67.0 | 148.0 | 1.480 | 30.588 |       |
|                  | 1 | 45 | 56.0 | 168.0 | 1.680 | 19.841 |       |
|                  | 2 | 48 | 60.0 | 144.0 | 1.440 | 28.935 |       |
|                  | 2 | 50 | 57.0 | 140.0 | 1.400 | 29.082 |       |
|                  | 2 | 56 | 66.0 | 152.0 | 1.520 | 28.566 |       |
|                  | 2 | 51 | 70.0 | 151.0 | 1.510 | 30.700 |       |
|                  | 2 | 56 | 55.0 | 150.0 | 1.500 | 24.444 |       |
|                  | 2 | 45 | 69.0 | 158.0 | 1.580 | 27.640 |       |
|                  | 2 | 70 | 53.0 | 148.0 | 1.480 | 24.196 |       |
|                  | 2 | 53 | 52.0 | 157.0 | 1.570 | 21.096 |       |
|                  | 2 | 42 | 71.0 | 157.0 | 1.570 | 28.804 |       |
|                  | 2 | 48 | 82.0 | 164.0 | 1.640 | 30.488 |       |
|                  | 2 | 65 | 67.0 | 146.0 | 1.460 | 31.432 |       |
|                  | 2 | 46 | 94.0 | 150.0 | 1.500 | 41.778 |       |
|                  | 1 | 68 | 60.0 | 160.0 | 1.600 | 23.437 |       |
|                  | 2 | 53 | 78.0 | 146.0 | 1.460 | 36.592 |       |

|  |   |    |      |       |       |        |  |
|--|---|----|------|-------|-------|--------|--|
|  | 2 | 68 | 58.0 | 145.0 | 1.450 | 27.586 |  |
|  | 2 | 61 | 66.0 | 157.0 | 1.570 | 26.776 |  |
|  | 2 | 65 | 45.0 | 144.0 | 1.440 | 21.701 |  |
|  | 2 | 59 | 74.0 | 149.0 | 1.490 | 33.332 |  |
|  | 2 | 61 | 55.0 | 150.0 | 1.500 | 24.444 |  |
|  | 1 | 55 | 76.0 | 170.0 | 1.700 | 26.298 |  |
|  | 2 | 52 | 54.0 | 153.0 | 1.530 | 23.068 |  |
|  | 2 | 69 | 40.0 | 139.0 | 1.390 | 20.703 |  |
|  | 2 | 56 | 71.0 | 154.0 | 1.540 | 29.938 |  |
|  | 2 | 57 | 44.0 | 146.0 | 1.460 | 20.642 |  |
|  | 2 | 60 | 81.0 | 155.0 | 1.550 | 33.715 |  |
|  | 1 | 68 | 52.0 | 168.0 | 1.680 | 18.424 |  |
|  | 1 | 59 | 83.0 | 162.0 | 1.620 | 31.626 |  |
|  | 2 | 53 | 71.0 | 156.0 | 1.560 | 29.175 |  |
|  | 2 | 74 | 52.0 | 153.0 | 1.530 | 22.214 |  |
|  | 2 | 71 | 67.0 | 153.0 | 1.530 | 28.621 |  |
|  | 2 | 64 | 45.0 | 147.0 | 1.470 | 20.825 |  |
|  | 2 | 68 | 60.0 | 153.0 | 1.530 | 25.631 |  |
|  | 2 | 64 | 56.0 | 147.0 | 1.470 | 25.915 |  |
|  | 2 | 60 | 61.0 | 151.0 | 1.510 | 26.753 |  |
|  | 2 | 68 | 57.0 | 154.0 | 1.540 | 24.034 |  |
|  | 2 | 72 | 49.0 | 143.0 | 1.430 | 23.962 |  |
|  | 2 | 55 | 63.0 | 157.0 | 1.570 | 25.559 |  |
|  | 2 | 70 | 60.0 | 153.0 | 1.530 | 25.631 |  |
|  | 2 | 60 | 50.0 | 144.0 | 1.440 | 24.113 |  |
|  | 1 | 48 | 79.0 | 165.0 | 1.650 | 29.017 |  |
|  | 2 | 66 | 65.0 | 148.0 | 1.480 | 29.675 |  |
|  | 2 | 73 | 63.0 | 148.0 | 1.480 | 28.762 |  |
|  | 2 | 65 | 68.0 | 140.0 | 1.400 | 34.694 |  |
|  | 2 | 57 | 70.0 | 152.0 | 1.520 | 30.298 |  |
|  | 2 | 69 | 60.0 | 144.0 | 1.440 | 28.935 |  |
|  | 2 | 59 | 61.0 | 152.0 | 1.520 | 26.402 |  |
|  | 2 | 60 | 79.0 | 154.0 | 1.540 | 33.311 |  |
|  | 2 | 53 | 57.0 | 147.0 | 1.470 | 26.378 |  |
|  | 1 | 54 | 62.0 | 156.0 | 1.560 | 25.477 |  |
|  | 2 | 58 | 53.0 | 143.0 | 1.430 | 25.918 |  |
|  | 2 | 53 | 51.0 | 144.0 | 1.440 | 24.595 |  |
|  | 1 | 66 | 82.0 | 167.0 | 1.670 | 29.402 |  |

| Lama Durasi DM | Serum (mg/dL)R/M | Sistole | Diastole | HbA1c | KreatininSerum (mg/dL) | Urin albumin (mg/L) | Urin kreatinin (g/l) | Urin albumin (mcg/dl) |
|----------------|------------------|---------|----------|-------|------------------------|---------------------|----------------------|-----------------------|
|                | 0.46             | 165     | 89       | 4.7   |                        | 1.9                 | 0.514                | 188                   |
|                | 0.61             | 127     | 96       | 6.8   |                        | 0.0                 | 0.265                | 0                     |
|                | 0.74             | 97      | 65       | 5.3   |                        | 1.9                 | 0.179                | 188                   |
|                | 0.79             | 152     | 76       | 7.1   |                        | 8.9                 | 0.719                | 895                   |
|                | 0.71             | 183     | 93       | 5.8   |                        | 13.7                | 0.799                | 1365                  |
|                | 0.64             | 151     | 93       | 6.5   |                        | 0.0                 | 0.977                | 0                     |
|                | 0.57             | 160     | 122      | 6.5   |                        | 0.0                 | 0.268                | 0                     |
|                | 0.83             | 170     | 91       | 7.1   |                        | 16.0                | 1.345                | 1601                  |
|                | 0.92             | 117     | 87       | 7.4   |                        | 6.6                 | 1.845                | 659                   |
|                | 0.45             | 166     | 81       | 9.6   |                        | 0.0                 | 0.491                | 0                     |
|                | 1.99             | 114     | 69       | 8.6   |                        | 251.4               | 0.452                | 25141                 |
|                | 0.32             | 147     | 94       | 12.4  |                        | 0.0                 | 0.174                | 0                     |
|                | 0.66             |         |          | 6.0   |                        | 8.9                 | 1.219                | 895                   |
|                | 0.66             | 154     | 76       | 7.5   |                        | 27.8                | 0.954                | 2778                  |
|                | 1.05             | 150     | 95       | 8.3   |                        | 0.0                 | 0.255                | 0                     |
|                | 0.68             | 142     | 85       | 9.8   |                        | 8.9                 | 0.871                | 895                   |
|                | 0.92             | 172     | 105      | 75.0  |                        | 1.9                 | 0.834                | 188                   |
|                | 0.67             | 111     | 60       | 6.7   |                        | 0.0                 | 0.661                | 0                     |
|                | 0.86             | 185     | 95       | 7.9   |                        | 13.7                | 0.520                | 1365                  |
|                | 0.84             | 121     | 66       | 5.9   |                        | 1.9                 | 0.502                | 188                   |
|                | 1.16             | 110     | 80       | 6.5   |                        | 32.5                | 0.282                | 3249                  |
|                | 0.51             | 151     | 90       | 10.3  |                        | 18.4                | 0.852                | 1836                  |
|                | 0.87             | 142     | 94       | 9.1   |                        | 49.0                | 1.238                | 4896                  |
|                | 0.66             | 142     | 102      | 11.1  |                        | 4.2                 | 0.411                | 424                   |
|                | 0.93             |         |          | 11.0  |                        | 6.6                 | 0.848                | 659                   |
|                | 0.79             | 163     | 76       | 7.9   |                        | 41.9                | 0.690                | 4190                  |
|                | 0.84             | 152     | 72       | 8.0   |                        | 16.0                | 1.079                | 1601                  |
|                | 3.00             | 195     | 112      | 6.4   |                        | 592.8               | 1.271                | 59275                 |
|                | 1.00             | 162     | 81       | 11.8  |                        |                     | 0.619                |                       |
|                | 0.70             | 196     | 80       | 14.0  |                        |                     | 0.415                |                       |
|                | 0.44             | 116     | 60       | 8.0   | 0.44                   |                     | 0.626                |                       |
|                | 0.60             | 116     | 88       | 6.4   | 0.60                   |                     | 0.637                |                       |
|                | 1.24             | 146     | 86       | 6.6   | 1.24                   |                     | 1.373                |                       |
|                | 0.50             | 156     | 85       | 8.1   | 0.50                   |                     | 0.430                |                       |
|                | 1.78             | 113     | 72       | 8.2   | 1.78                   |                     | 0.923                |                       |
|                | 1.50             | 157     | 84       | 7.4   | 1.50                   |                     | 0.231                |                       |
|                | 1.17             |         |          | 7.0   | 1.17                   |                     | 0.029                |                       |
|                | 0.77             | 150     | 80       | 8.6   | 0.77                   |                     | 0.891                |                       |
|                | 5.45             |         |          | 9.3   | 5.45                   |                     | 0.185                |                       |
|                | 0.62             |         |          | 8.7   | 0.62                   |                     | 1.160                |                       |
|                | 0.85             | 132     | 78       | 7.1   | 0.85                   |                     | 0.995                |                       |
|                | 0.62             | 160     | 75       | 6.4   | 0.62                   |                     | 1.035                |                       |
|                | 0.86             | 116     | 67       | 6.5   | 0.86                   |                     | 1.268                |                       |
|                | 1.18             | 134     | 60       | 6.2   | 1.18                   |                     | 0.315                |                       |
|                | 1.29             | 119     | 78       | 8.2   | 1.29                   |                     | 1.233                |                       |

|  |      |     |     |      |      |       |       |       |
|--|------|-----|-----|------|------|-------|-------|-------|
|  | 0.71 | 140 | 80  | 7.5  | 0.71 |       | 1.000 |       |
|  | 0.82 | 148 | 77  | 5.6  | 0.82 |       | 0.477 |       |
|  | 0.60 | 165 | 119 | 6.3  | 0.60 |       | 0.030 |       |
|  | 0.67 | 130 | 81  | 7.1  | 0.67 |       | 0.307 |       |
|  | 1.38 | 109 | 64  | 7.8  | 1.38 |       | 0.461 |       |
|  | 1.00 | 164 | 100 | 14.0 | 1.00 |       | 0.206 |       |
|  | 0.92 | 159 | 71  | 10.4 | 0.92 |       | 0.214 |       |
|  | 0.73 | 119 | 78  | 6.0  | 0.73 |       | 0.317 |       |
|  | 0.76 | 169 | 92  | 5.7  | 0.76 |       | 0.921 |       |
|  | 0.57 | 199 | 88  | 5.6  | 0.57 |       | 0.272 |       |
|  | 0.70 | 116 | 73  | 8.0  | 0.70 |       | 0.720 |       |
|  | 0.77 | 190 | 73  | 7.2  | 0.77 |       | 0.373 |       |
|  | 1.04 | 165 | 77  | 6.1  | 1.04 |       | 0.451 |       |
|  | 1.54 | 123 | 64  | 5.1  | 1.54 |       | 0.836 |       |
|  | 1.81 | 131 | 81  | 6.7  | 1.81 |       | 0.153 |       |
|  | 1.16 | 100 | 70  | 5.7  | 1.16 | 0.0   | 1.281 | 0     |
|  | 0.44 | 130 | 80  | 8.4  | 0.44 | 1.5   | 0.563 | 152   |
|  | 0.79 | 180 | 100 | 8.0  | 0.79 | 0.0   | 0.603 | 0     |
|  | 0.96 | 120 | 80  | 8.8  | 0.96 | 0.0   | 2.193 | 0     |
|  | 1.29 | 140 | 70  | 9.9  | 1.29 | 34.5  | 0.681 | 3448  |
|  | 0.82 | 110 | 80  | 7.2  | 0.82 | 0.0   | 0.665 | 0     |
|  | 0.67 | 140 | 90  | 8.0  | 0.67 | 24.3  | 0.598 | 2434  |
|  | 0.70 | 140 | 80  | 6.4  | 0.70 | 64.9  | 0.692 | 6491  |
|  | 0.59 | 130 | 80  | 10.9 | 0.59 | 123.2 | 1.712 | 12323 |
|  | 0.78 | 120 | 80  | 10.8 | 0.78 | 24.3  | 1.431 | 2434  |
|  | 1.53 | 120 | 70  | 7.7  | 1.53 | 0.0   | 0.105 | 0     |
|  | 1.45 | 140 | 70  | 6.1  | 1.45 | 0.0   | 0.166 | 0     |
|  | 0.74 | 110 | 80  | 11.0 | 0.74 | 70.0  | 1.044 | 6998  |
|  | 0.76 | 110 | 70  | 8.5  | 0.76 | 11.7  | 0.092 | 1166  |
|  | 0.51 | 120 | 80  | 10.9 | 0.51 | 227.2 | 0.430 | 22718 |
|  | 0.59 | 120 | 80  | 6.9  | 0.59 | 52.2  | 0.669 | 5223  |
|  | 0.86 | 90  | 60  | 6.1  | 0.86 | 0.0   | 0.337 | 0     |
|  | 0.70 | 100 | 70  | 10.3 | 0.70 | 1.5   | 1.407 | 152   |
|  | 0.89 | 100 | 70  | 7.5  | 0.89 | 1.5   | 0.662 | 152   |
|  | 1.19 | 150 | 80  | 8.9  | 1.19 | 0.0   | 1.327 | 0     |
|  | 0.50 | 110 | 70  | 8.9  | 0.50 | 11.7  | 1.691 | 1166  |
|  | 0.77 | 130 | 90  | 9.8  | 0.77 | 0.0   | 0.714 | 0     |
|  | 0.45 | 120 | 70  | 6.7  | 0.45 | 0.0   | 0.485 | 0     |
|  | 0.85 | 120 | 70  | 7.8  | 0.85 | 19.3  | 1.083 | 1927  |
|  | 0.92 | 110 | 70  | 7.7  | 0.92 | 0.0   | 1.660 | 0     |
|  | 0.42 | 140 | 90  | 9.2  | 0.42 | 1.5   | 0.516 | 152   |
|  | 2.08 | 130 | 80  | 11.4 | 2.08 | 11.7  | 0.760 | 1166  |
|  | 0.36 | 110 | 80  | 11.0 | 0.36 | 29.4  | 0.358 | 2941  |
|  | 1.96 | 150 | 90  | 8.4  | 1.96 | 0.0   | 0.710 | 0     |
|  | 0.56 | 110 | 80  | 8.4  | 0.56 | 11.7  | 1.566 | 1166  |
|  | 0.61 | 140 | 80  | 9.6  | 0.61 | 34.5  | 1.236 | 3448  |
|  | 0.90 | 140 | 80  | 6.5  | 0.90 | 42.1  | 1.242 | 4209  |
|  | 0.55 | 140 | 90  | 8.6  | 0.55 | 1.5   | 0.668 | 152   |

|  |      |     |    |      |      |       |       |       |
|--|------|-----|----|------|------|-------|-------|-------|
|  | 0.62 | 100 | 80 | 9.6  | 0.62 | 24.3  | 1.812 | 2434  |
|  | 1.08 | 140 | 90 | 6.8  | 1.08 | 0.0   | 1.924 | 0     |
|  | 0.68 | 120 | 80 | 6.5  | 0.68 | 37.0  | 3.465 | 3702  |
|  | 0.52 | 140 | 90 | 7.2  | 0.52 | 0.0   | 1.104 | 0     |
|  | 1.34 | 120 | 70 | 6.7  | 1.34 | 105.5 | 0.786 | 10548 |
|  | 0.84 | 120 | 70 | 13.2 | 0.84 | 0.0   | 0.017 | 0     |
|  | 0.50 | 100 | 60 | 13.1 | 0.50 | 19.3  | 0.385 | 1927  |
|  | 0.36 | 140 | 80 | 9.0  | 0.36 | 156.2 | 1.960 | 15619 |
|  | 1.25 | 120 | 80 | 8.8  | 1.25 | 0.0   | 1.162 | 0     |
|  | 0.47 | 120 | 80 | 7.9  | 0.47 | 0.0   | 0.442 | 0     |
|  | 0.57 | 120 | 80 | 8.2  | 0.57 | 24.3  | 1.259 | 2434  |
|  | 0.79 | 110 | 80 | 6.3  | 0.79 | 19.3  | 1.304 | 1927  |
|  | 1.84 | 160 | 80 | 7.4  | 1.84 | 0.0   | 0.788 | 0     |
|  | 0.67 | 120 | 70 | 10.9 | 0.67 | 19.3  | 2.255 | 1927  |
|  | 0.43 | 130 | 80 | 9.3  | 0.43 | 11.7  | 0.766 | 1166  |
|  | 1.46 | 130 | 70 | 8.1  | 1.46 | 6.6   | 1.787 | 659   |
|  | 0.89 | 110 | 70 | 8.2  | 0.89 | 236.0 | 2.572 | 23596 |
|  | 0.93 | 120 | 80 | 9.4  | 0.93 | 0.0   | 0.997 | 0     |
|  | 0.67 | 150 | 90 | 9.4  | 0.67 | 29.1  | 0.994 | 2911  |
|  | 0.70 | 130 | 80 | 9.7  | 0.70 | 0.0   | 0.790 | 0     |
|  | 0.54 | 140 | 90 | 9.0  | 0.54 | 0.0   | 0.332 | 0     |
|  | 0.70 | 160 | 90 | 9.6  | 0.70 | 0.0   | 0.875 | 0     |
|  | 0.49 | 120 | 80 | 10.7 | 0.49 | 133.8 | 0.609 | 13381 |
|  | 0.68 | 110 | 80 | 6.9  | 0.68 | 0.0   | 0.795 | 0     |
|  | 0.78 | 110 | 80 | 9.3  | 0.78 | 0.0   | 1.182 | 0     |
|  | 1.55 | 140 | 90 | 8.8  | 1.55 | 18.9  | 1.396 | 1890  |
|  | 0.63 | 130 | 70 | 11.5 | 0.63 | 59.8  | 0.044 | 5976  |
|  | 1.33 | 120 | 80 | 7.9  | 1.33 | 0.0   | 1.090 | 0     |
|  | 0.55 | 130 | 80 | 11.7 | 0.55 | 36.8  | 1.215 | 3677  |
|  | 0.66 | 130 | 80 | 9.5  | 0.66 | 0.0   | 0.786 | 0     |
|  | 1.24 | 120 | 80 | 6.4  | 1.24 | 39.3  | 1.741 | 3933  |
|  | 0.71 | 130 | 80 | 8.5  | 0.71 | 57.2  | 1.175 | 5720  |
|  | 0.68 | 120 | 70 | 8.1  | 0.68 | 0.0   | 1.062 | 0     |
|  | 0.57 | 110 | 70 | 11.7 | 0.57 | 0.0   | 0.564 | 0     |
|  | 0.42 | 130 | 90 | 6.6  | 0.42 | 0.0   | 0.167 | 0     |
|  | 1.57 | 130 | 80 | 7.5  | 1.57 | 0.0   | 3.229 | 0     |
|  | 0.70 | 110 | 70 | 11.0 | 0.70 | 884.6 | 0.571 | 88458 |
|  | 0.63 | 140 | 90 | 10.9 | 0.63 | 0.0   | 0.302 | 0     |
|  | 0.77 | 120 | 80 | 8.3  | 0.77 | 164.5 | 0.111 | 16445 |
|  | 0.73 | 110 | 80 | 12.5 | 0.73 | 103.2 | 0.337 | 10317 |
|  | 1.88 | 100 | 70 | 9.5  | 1.88 | 0.0   | 1.160 | 0     |
|  | 0.51 | 120 | 80 | 11.4 | 0.51 | 18.9  | 0.682 | 1890  |
|  | 0.67 | 120 | 80 | 8.6  | 0.67 | 0.0   | 0.856 | 0     |
|  | 0.47 | 120 | 90 | 8.8  | 0.47 | 0.0   | 0.259 | 0     |
|  | 0.47 | 140 | 70 | 9.2  | 0.47 | 0.0   | 0.985 | 0     |
|  | 0.90 | 120 | 80 | 8.1  | 0.90 | 0.0   | 0.609 | 0     |
|  | 0.68 | 110 | 80 | 7.9  | 0.68 | 0.0   | 0.075 | 0     |
|  | 1.02 | 140 | 70 | 8.9  | 1.02 | 0.0   | 0.807 | 0     |

|    |      |     |    |      |      |        |       |        |
|----|------|-----|----|------|------|--------|-------|--------|
|    | 0.76 | 120 | 70 | 10.0 | 0.76 | 0.0    | 3.388 | 0      |
|    | 0.92 | 120 | 80 | 8.8  | 0.92 | 72.5   | 1.604 | 7252   |
|    | 1.50 | 160 | 90 | 10.5 | 1.50 | 44.4   | 0.865 | 4443   |
|    | 0.70 | 150 | 90 | 9.2  | 0.70 | 1837.1 | 1.193 | 183708 |
|    | 0.50 | 120 | 70 | 9.9  | 0.50 | 0.0    | 1.541 | 0      |
|    | 0.71 | 140 | 80 | 9.0  | 0.71 | 0.0    | 1.040 | 0      |
|    | 0.42 | 120 | 80 | 6.4  | 0.42 | 0.0    | 1.464 | 0      |
|    | 0.53 | 100 | 70 | 11.9 | 0.53 | 24.0   | 0.752 | 2400   |
|    | 1.48 | 100 | 70 | 8.4  | 1.48 | 0.0    | 0.442 | 0      |
|    | 0.65 | 140 | 80 | 10.7 | 0.65 | 223.2  | 0.524 | 22319  |
|    | 0.72 | 130 | 80 | 8.9  | 0.72 | 6.1    | 0.013 | 613    |
|    | 0.30 | 120 | 80 | 11.3 | 0.30 | 0.0    | 1.523 | 0      |
|    | 0.69 | 130 | 70 | 8.1  | 0.69 | 11.2   | 0.685 | 1124   |
|    | 0.44 | 150 | 80 | 9.4  | 0.44 | 192.5  | 0.152 | 19254  |
|    | 0.58 | 120 | 80 | 7.9  | 0.58 | 0.0    | 1.166 | 0      |
|    | 0.58 | 130 | 80 | 8.1  | 0.58 | 0.0    | 0.154 | 0      |
|    | 0.56 | 130 | 90 | 7.5  | 0.56 | 0.0    | 0.407 | 0      |
|    | 0.95 | 130 | 70 | 7.3  | 0.95 | 0.0    | 0.892 | 0      |
|    | 0.52 | 130 | 80 | 8.4  | 0.52 | 172.1  | 0.281 | 17211  |
|    | 0.95 | 190 | 90 | 11.1 | 0.95 | 0.0    | 0.319 | 0      |
|    | 1.11 | 110 | 70 | 6.3  | 1.11 | 861.6  | 0.568 | 86159  |
|    | 0.73 | 110 | 60 | 12.8 | 0.73 | 205.3  | 0.740 | 20531  |
|    | 0.89 | 140 | 80 | 9.1  | 0.89 | 110.8  | 0.968 | 11083  |
|    | 1.69 | 140 | 70 | 5.6  | 1.69 | 1.0    | 0.567 | 102    |
|    | 0.54 | 130 | 80 | 10.0 | 0.54 | 0.0    | 0.444 | 0      |
|    | 1.21 | 140 | 70 | 9.0  | 1.21 | 1.0    | 1.209 | 102    |
|    | 0.36 | 110 | 70 | 12.3 | 0.36 | 0.0    | 1.517 | 0      |
|    | 1.05 | 130 | 90 | 10.2 | 1.05 | 29.1   | 1.321 | 2911   |
|    | 3.71 | 140 | 80 | 7.0  | 3.71 | 67.4   | 1.824 | 6742   |
|    | 0.42 | 120 | 80 | 12.1 | 0.42 | 0.0    | 1.216 | 0      |
|    | 0.77 | 100 | 70 | 8.2  | 0.77 | 187.4  | 0.444 | 18744  |
|    | 1.00 | 110 | 70 | 7.2  | 1.00 | 34.2   | 0.334 | 3422   |
| 2  |      | 110 | 70 | 8.6  | 0.62 | 52.0   | 0.498 | 5200   |
| 7  |      | 130 | 80 | 11.6 | 1.00 | 8.8    | 0.746 | 880    |
| 2  |      | 110 | 70 | 9.6  | 0.62 | 5.0    | 0.294 | 500    |
| 3  |      | 110 | 70 | 7.9  | 0.62 | 33.5   | 0.927 | 3350   |
| 1  |      | 110 | 70 | 6.4  | 0.59 | 9.6    | 0.339 | 960    |
| 8  |      | 100 | 70 | 8.4  | 0.52 | 5.0    | 0.464 | 500    |
| 8  |      | 110 | 80 | 7.6  | 0.51 | 200.0  | 2.036 | 20000  |
| 7  |      | 110 | 70 | 8.1  | 0.78 | 196.0  | 0.407 | 19600  |
|    |      | 130 | 80 | 8.2  | 0.63 | 50.2   | 1.832 | 5020   |
| 10 |      | 130 | 80 | 12.3 | 0.47 | 7.3    | 0.713 | 730    |
| 3  |      | 110 | 70 | 9.4  | 0.77 | 5.0    | 0.758 | 500    |
| 4  |      | 150 | 90 | 8.5  | 0.56 | 17.0   | 0.373 | 1700   |
| 7  |      | 100 | 70 | 7.0  | 0.69 | 5.0    | 0.837 | 500    |
| 1  |      | 110 | 70 | 6.9  | 0.54 | 5.0    | 0.407 | 500    |
| 24 |      | 110 | 70 | 12.1 | 0.75 | 28.4   | 2.624 | 2840   |
| 5  |      | 120 | 80 | 9.9  | 0.62 | 196.0  | 0.407 | 19600  |

|    |  |     |    |      |      |       |       |       |
|----|--|-----|----|------|------|-------|-------|-------|
| 10 |  | 130 | 80 | 9.2  | 0.53 | 18.8  | 1.911 | 1880  |
| 2  |  | 120 | 80 | 6.6  | 0.72 | 7.6   | 0.837 | 760   |
| 1  |  | 120 | 80 | 7.0  | 0.57 | 8.0   | 0.577 | 800   |
| 9  |  | 120 | 80 | 8.6  | 0.70 | 17.6  | 1.086 | 1760  |
|    |  | 130 | 80 | 10.1 | 0.69 | 31.4  | 2.036 | 3140  |
| 5  |  | 120 | 80 | 8.9  | 0.81 |       | 0.837 | 0     |
|    |  | 110 | 70 | 8.6  | 0.68 | 10.8  | 1.086 | 1080  |
| 19 |  | 110 | 70 | 8.2  | 0.73 | 125.3 | 0.486 | 12530 |
|    |  | 120 | 80 | 6.5  | 0.45 | 200.0 | 1.730 | 20000 |
| 15 |  | 120 | 80 | 9.3  | 0.68 | 74.2  | 1.719 | 7420  |
|    |  | 100 | 70 | 7.6  | 0.75 | 200.0 | 0.317 | 20000 |
| 19 |  | 130 | 80 | 8.6  | 1.10 | 10.1  | 0.385 | 1010  |
|    |  | 130 | 80 | 8.9  | 1.16 | 200.0 | 0.430 | 20000 |
|    |  | 100 | 70 | 9.9  | 0.76 | 50.9  | 0.995 | 5090  |
| 18 |  | 140 | 90 | 10.7 | 0.71 | 5.1   | 0.260 | 510   |
|    |  | 130 | 80 | 9.2  | 0.77 | 200.0 | 1.595 | 20000 |
|    |  | 130 | 80 | 6.5  | 0.77 | 98.8  | 0.927 | 9880  |
|    |  | 110 | 70 | 7.8  | 0.83 | 5.0   | 0.215 | 500   |
|    |  | 130 | 80 | 11.9 | 0.77 | 73.6  | 1.990 | 7360  |
|    |  | 130 | 80 | 7.9  | 0.94 | 70.3  | 0.611 | 7030  |
| 12 |  | 130 | 80 | 6.1  | 0.89 | 5.0   | 0.565 | 500   |
| 9  |  | 130 | 80 | 6.0  | 0.88 | 5.0   | 0.622 | 500   |
| 5  |  | 100 | 70 | 8.7  | 0.79 | 8.4   | 0.667 | 840   |
| 6  |  | 120 | 70 | 9.2  | 0.78 | 5.0   | 0.317 | 500   |
| 19 |  | 120 | 70 | 10.0 | 0.94 | 8.9   | 0.351 | 890   |
| 5  |  | 100 | 60 | 8.2  | 1.00 | 200.0 | 0.667 | 20000 |
|    |  | 130 | 80 | 7.6  | 0.86 | 62.3  | 0.554 | 6230  |
| 10 |  | 130 | 80 | 6.3  | 0.73 | 6.4   | 0.893 | 640   |
| 7  |  | 130 | 80 | 10.5 | 0.92 | 5.0   | 0.554 | 500   |
|    |  | 130 | 80 | 8.0  | 0.76 | 10.3  | 1.063 | 1030  |
| 10 |  | 130 | 80 | 6.9  | 0.71 | 36.2  | 0.407 | 3620  |
| 6  |  | 100 | 70 | 9.1  | 0.74 | 142.1 | 1.459 | 14210 |
| 15 |  | 120 | 80 | 11.5 | 0.90 | 88.0  | 0.871 | 8800  |
| 4  |  | 140 | 80 | 9.2  | 1.05 | 200.0 | 0.837 | 20000 |
|    |  | 110 | 70 | 6.1  | 1.09 | 5.3   | 1.086 | 530   |
|    |  | 130 | 70 | 9.8  | 0.96 | 5.0   | 0.305 | 500   |
|    |  | 130 | 80 | 6.9  | 0.77 | 0.0   | 0.837 | 0     |
| 10 |  | 110 | 70 | 7.1  | 1.12 | 5.0   | 1.108 | 500   |

| Urin kreatinin (mg/dl) | Exercise Routine | Smoking habit |
|------------------------|------------------|---------------|
| 51.4                   |                  |               |
| 26.5                   |                  |               |
| 17.9                   |                  |               |
| 71.9                   |                  |               |
| 79.9                   |                  |               |
| 97.7                   |                  |               |
| 26.8                   |                  |               |
| 134.5                  |                  |               |
| 184.5                  |                  |               |
| 49.1                   |                  |               |
| 45.2                   |                  |               |
| 17.4                   |                  |               |
| 121.9                  |                  |               |
| 95.4                   |                  |               |
| 25.5                   |                  |               |
| 87.1                   |                  |               |
| 83.4                   |                  |               |
| 66.1                   |                  |               |
| 52                     |                  |               |
| 50.2                   |                  |               |
| 28.2                   |                  |               |
| 85.2                   |                  |               |
| 123.8                  |                  |               |
| 41.1                   |                  |               |
| 84.8                   |                  |               |
| 69                     |                  |               |
| 107.9                  |                  |               |
| 127.1                  |                  |               |
| 61.9                   |                  |               |
| 41.5                   |                  |               |
| 62.6                   |                  |               |
| 63.7                   |                  |               |
| 137.3                  |                  |               |
| 43                     |                  |               |
| 92.3                   |                  |               |
| 23.1                   |                  |               |
| 2.9                    |                  |               |
| 89.1                   |                  |               |
| 18.5                   |                  |               |
| 116                    |                  |               |
| 99.5                   |                  |               |
| 103.5                  |                  |               |
| 126.8                  |                  |               |
| 31.5                   |                  |               |
| 123.3                  |                  |               |

**Afinion ACR**

EU unit  
 range urin albumin  
 range urin kreatinin  
 range UACR

The Afinion ACR reportable ranges are the following: **5.0 t**  
 5.0 to 200.0 mg/L for albumin  
 1.5 to 30.0 mM for creatinine  
 0.1 to 140 mg/mmol

**US unit**

range urin albumin  
 range urin kreatinin  
 range UACR

16.4 to 416,3877.5 mcg/dl  
 16.4 to 339.9 mg/dL  
 1.0 to 1225.0 mg/g atau mcg/mg



|       |   |   |
|-------|---|---|
| 100   |   |   |
| 47.7  |   |   |
| 3     |   |   |
| 30.7  |   |   |
| 46.1  |   |   |
| 20.6  |   |   |
| 21.4  |   |   |
| 31.7  |   |   |
| 92.1  |   |   |
| 27.2  |   |   |
| 72    |   |   |
| 37.3  |   |   |
| 45.1  |   |   |
| 83.6  |   |   |
| 15.3  |   |   |
| 128.1 | 0 | 0 |
| 56.3  | 1 | 0 |
| 60.3  | 0 | 0 |
| 219.3 | 1 | 0 |
| 68.1  | 1 | 1 |
| 66.5  | 1 | 0 |
| 59.8  | 1 | 0 |
| 69.2  | 1 | 0 |
| 171.2 | 0 | 0 |
| 143.1 | 1 | 0 |
| 10.5  | 0 | 0 |
| 16.6  | 1 | 0 |
| 104.4 | 1 | 0 |
| 9.2   | 0 | 0 |
| 43    | 0 | 0 |
| 66.9  | 1 | 0 |
| 33.7  | 1 | 0 |
| 140.7 | 0 | 0 |
| 66.2  | 1 | 0 |
| 132.7 | 0 | 0 |
| 169.1 | 1 | 0 |
| 71.4  | 0 | 0 |
| 48.5  | 0 | 0 |
| 108.3 | 1 | 0 |
| 166   | 1 | 0 |
| 51.6  | 1 | 0 |
| 76    | 1 | 0 |
| 35.8  | 1 | 0 |
| 71    | 1 | 0 |
| 156.6 | 1 | 0 |
| 123.6 | 1 | 0 |
| 124.2 | 1 | 0 |
| 66.8  | 1 | 0 |

|       |   |   |
|-------|---|---|
| 181.2 | 1 | 0 |
| 192.4 | 1 | 0 |
| 346.5 | 0 | 1 |
| 110.4 | 1 | 0 |
| 78.6  | 1 | 0 |
| 1.7   | 0 | 0 |
| 38.5  | 1 | 0 |
| 196   | 1 | 0 |
| 116.2 | 0 | 0 |
| 44.2  | 0 | 0 |
| 125.9 | 0 | 0 |
| 130.4 | 1 | 0 |
| 78.8  | 0 | 0 |
| 225.5 | 0 | 0 |
| 76.6  | 0 | 0 |
| 178.7 | 1 | 0 |
| 257.2 | 1 | 0 |
| 99.7  | 1 | 0 |
| 99.4  | 1 | 0 |
| 79    | 1 | 0 |
| 33.2  | 1 | 0 |
| 87.5  | 0 | 0 |
| 60.9  | 1 | 0 |
| 79.5  | 1 | 0 |
| 118.2 | 0 | 0 |
| 139.6 | 0 | 0 |
| 4.4   | 1 | 0 |
| 109   | 1 | 0 |
| 121.5 | 1 | 0 |
| 78.6  | 1 | 0 |
| 174.1 | 0 | 0 |
| 117.5 | 1 | 0 |
| 106.2 | 1 | 0 |
| 56.4  | 1 | 0 |
| 16.7  | 0 | 0 |
| 322.9 | 1 | 0 |
| 57.1  | 1 | 0 |
| 30.2  | 0 | 0 |
| 11.1  | 1 | 0 |
| 33.7  | 0 | 0 |
| 116   | 1 | 0 |
| 68.2  | 1 | 0 |
| 85.6  | 1 | 1 |
| 25.9  | 1 | 0 |
| 98.5  | 1 | 0 |
| 60.9  | 1 | 0 |
| 7.5   | 1 | 0 |
| 80.7  | 0 | 0 |

|       |   |   |
|-------|---|---|
| 338.8 | 1 | 0 |
| 160.4 | 1 | 0 |
| 86.5  | 0 | 0 |
| 119.3 | 1 | 0 |
| 154.1 | 1 | 0 |
| 104   | 0 | 0 |
| 146.4 | 1 | 0 |
| 75.2  | 1 | 0 |
| 44.2  | 1 | 0 |
| 52.4  | 0 | 0 |
| 1.3   | 1 | 0 |
| 152.3 | 1 | 0 |
| 68.5  | 1 | 0 |
| 15.2  | 0 | 0 |
| 116.6 | 0 | 0 |
| 15.4  | 1 | 0 |
| 40.7  | 1 | 0 |
| 89.2  | 1 | 0 |
| 28.1  | 1 | 0 |
| 31.9  | 1 | 0 |
| 56.8  | 1 | 0 |
| 74    | 1 | 0 |
| 96.8  | 1 | 0 |
| 56.7  | 1 | 0 |
| 44.4  | 0 | 0 |
| 120.9 | 0 | 0 |
| 151.7 | 1 | 0 |
| 132.1 | 0 | 0 |
| 182.4 | 1 | 0 |
| 121.6 | 1 | 0 |
| 44.4  | 1 | 0 |
| 33.4  | 1 | 0 |
| 49.8  | 0 | 0 |
| 74.6  | 1 | 0 |
| 29.4  | 1 | 0 |
| 92.7  | 0 | 0 |
| 33.9  | 1 | 0 |
| 46.4  | 0 | 0 |
| 203.6 | 0 | 0 |
| 40.7  | 1 | 0 |
| 183.2 | 1 | 0 |
| 71.3  | 0 | 0 |
| 75.8  | 0 | 0 |
| 37.3  | 1 | 0 |
| 83.7  | 1 | 0 |
| 40.7  | 1 | 0 |
| 262.4 | 1 | 0 |
| 40.7  | 1 | 0 |

|       |   |   |
|-------|---|---|
| 191.1 | 1 | 0 |
| 83.7  | 0 | 0 |
| 57.7  | 0 | 0 |
| 108.6 | 1 | 0 |
| 203.6 | 0 | 0 |
| 83.7  | 0 | 0 |
| 108.6 | 1 | 0 |
| 48.6  | 0 | 0 |
| 173   | 0 | 0 |
| 171.9 | 1 | 0 |
| 31.7  | 0 | 0 |
| 38.5  | 0 | 0 |
| 43    | 0 | 1 |
| 99.5  | 1 | 0 |
| 26    | 0 | 0 |
| 159.5 | 0 | 0 |
| 92.7  | 0 | 0 |
| 21.5  | 1 | 0 |
| 199   | 1 | 0 |
| 61.1  | 1 | 0 |
| 56.5  | 0 | 0 |
| 62.2  | 0 | 0 |
| 66.7  | 1 | 0 |
| 31.7  | 0 | 0 |
| 35.1  | 1 | 0 |
| 66.7  | 0 | 0 |
| 55.4  |   | 0 |
| 89.3  | 0 | 0 |
| 55.4  | 0 | 0 |
| 106.3 | 0 | 0 |
| 40.7  | 0 | 0 |
| 145.9 | 1 | 0 |
| 87.1  | 1 | 0 |
| 83.7  | 0 | 0 |
| 108.6 | 0 | 0 |
| 30.5  | 1 | 0 |
| 83.7  | 1 | 0 |
| 110.8 | 1 | 0 |

o **200.0 mg/L** for albumin, 1.5 to 30.0 mM for creatinine (EU units), and 0.1 to 140 mg/mmol for ACR (European Union). The corre











Corresponding United States units for creatinine and ACR are 16.4 to 339.9 mg/dL and 1.0 to 1225.0 mg/g, respectively.
